# Supplementary material
Source: publisher figshare collection journal article supplement (https://gsapubs.figshare.com/ndownloader/files/22759709)
Supplement: Supplementary file 1 [file 22759709]

**Supplement to “Investigation of the strength contrast at the Moho: A case study from the Oman Ophiolite”**

**Janelle M. Homburg, Greg Hirth, Peter B. Kelemen**

**1. Methods**

**1.1. Thin Section Preparation**

Oriented thin sections were prepared from samples selected based on their texture and mineralogy. Samples analyzed by EBSD were polished for an additional hour on 0.02  $\mu\text{m}$  colloidal silica beyond the polishing done for microprobe analysis. Microprobe samples were C coated. EBSD samples were Au-Pd coated and then polished for an additional minute to remove most of the coating, leaving enough gold along cracks and grain boundaries to mitigate sample charging in the SEM.

**1.2. Grain Size Analysis**

Mean grain size was measured by line intercept method for plagioclase in the gabbro norite and olivine in the harzburgite. At least 100 grains were measured parallel to foliation. Because the grains are roughly equant, a geometric correction factor of 1.5 has been applied to the mean intercept lengths to obtain the average grain size (Underwood, 1970). The arithmetic mean was calculated to be consistent with Van der Wal (1993). However, since the grain size distributions are approximately log-normal, the geometric mean may be a more accurate measure of the average grain size. Both are given in Figure DR3.

**1.3. Thermometry**

**1.3.1. Pyroxene Thermometry**

Equilibrium temperatures were calculated for clinopyroxene/orthopyroxene pairs in the recrystallized rims of clinopyroxene porphyroclasts. The measured grains are equant with an average grain size of 220  $\mu\text{m}$ . Oxide weight percents were measured using the JEOL JXA-733 Superprobe (Massachusetts Institute of Technology), with a 10  $\mu\text{m}$  spot size, 10 nA beam current and an accelerating voltage of 15 kV (Table DR1). Using Ca-QUILF (Andersen et al., 1993; Lindsley and Frost, 1992), temperatures were calculated for 6 clinopyroxene/orthopyroxene pairs (Table DR1).

### 1.3.2. Amphibole/Plagioclase Thermometry

Equilibrium temperatures were calculated for metamorphic amphibole/plagioclase pairs in the tails of recrystallized clinopyroxene porphyroclasts. Average grain size of the measured amphibole is 175  $\mu\text{m}$  along the long axis of the grains and 70  $\mu\text{m}$  along the short axis, yielding an aspect ratio of 2.5. Oxide weight percents were measured using the Cameca Sx100 microprobe (The American Museum of Natural History), with a 10  $\mu\text{m}$  spot size, 10 nA beam current and an accelerating voltage of 15 kV (Table DR3). Temperatures were calculated for 4 amphibole/plagioclase pairs using HB-PLAG (Holland and Blundy, 1994, reaction A). (Plagioclase composition is roughly constant in every sample that was measured.) A range of temperatures of 600-800°C was calculated for the observed amphibole and plagioclase compositions (Tables DR2 and DR3). The average temperature calculated is 700°C. The standard deviation of the calculated temperatures is 80°C. However, reaction A involves quartz, whereas there is no quartz in our samples. As a result, the temperatures for Reaction A, derived from our amphibole compositions, represent upper bounds for the reaction at reduced silica activity.

### 1.3.4 THERMOCALC

Using the “mode 3” method of THERMOCALC (Powell and Holland, 1988) we determined equilibria for reactions based on the activities of mineral end-members for our plagioclase, pyroxene and most sodic amphibole compositions. We used four reactions to constrain temperature and pressure:

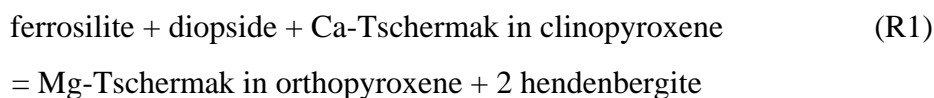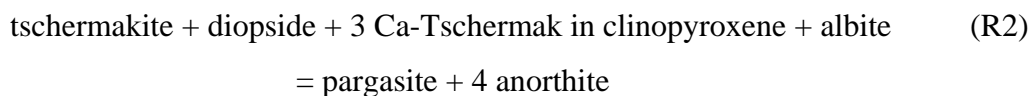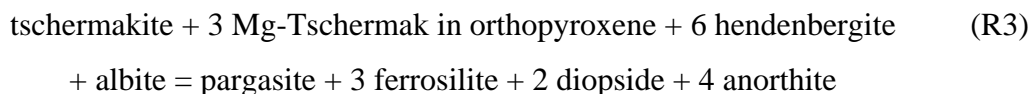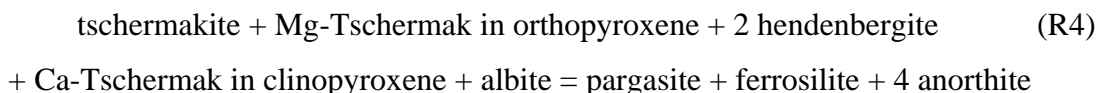

Based on these reactions we calculated equilibrium pressures and temperatures of  $550\pm 300$  MPa and  $570\pm 200^{\circ}\text{C}$  for the feldspar 8 from Table DR2, the pyroxene “Pair 5” from Table DR1 and the amphiboles 1 and 3 from Table DR3 (Figure DR4).

#### **1.4. EBSD Analysis**

EBSD data were collected using a JEOL 840 SEM (Marine Biological Laboratory/Woods Hole Oceanographic Institution) at 15 kV and a beam current of  $6 \times 10^{-8}$  amps. Both the olivine and plagioclase data were analyzed utilizing the HKL Channel 5+ software. The olivine data were collected by manual selection of the diffraction patterns. The plagioclase data were collected as maps with a step size of  $15 \mu\text{m}$  (approximately the grain size) to insure sufficient spatial coverage of the areas of interest. For each area of interest,  $>150$  grain orientations were obtained. This number has been shown to be sufficient to allow for robust comparisons of both fabric pattern and strength (Ben Ismail and Mainprice, 1998).

#### **2.1 Plagioclase Microstructures**

All of the gabbro-norite samples display evidence of plastic deformation. In the least deformed samples we observe the development of porphyroclasts ( $\sim 500 \mu\text{m}$ ), which display extensive deformation twinning and subgrain development, rimmed by small recrystallized grains ( $\sim 40 \mu\text{m}$ ) (Figure DR5). In the most deformed samples we observe mylonitic textures. The grains in the mylonites display no subgrain development, little twinning and curved, irregular boundaries (Figure 2A). In none of the samples do we observe evidence that melt was present during deformation and have interpreted the porphyroclastic grain size in the least deformed samples as representing the original igneous grain size of the plagioclase. Finally, because large portions of the fine grained ( $40 \mu\text{m}$ ) regions display an LPO, which reflects activity of dislocation creep, it seems unlikely that they represent annealed fault gouge rather than mylonites. Furthermore, the observation that the entire thickness of the deformed dikes shows evidence for crystal plastic deformation, while only the highest strain zone show complete recrystallization argues against a brittle precursor, although it would be difficult to rule this out.

#### **2.2. Zener Pining Analysis**

To explore the possibility that grain growth subsequent to deformation can affect the observed grain size we used a Zener pinning relationship with the form:

$$d = k \frac{d_{pin}}{f^m} \quad (1)$$

where  $d$  is the matrix grain size,  $d_{pin}$  is the pinning phase grain size,  $f$  is the volume fraction of the pinning phase,  $k$  is a proportionality constant and  $m$  depends on grain topology (e.g. Olgaard and Evans, 1986) to calculate the predicted pinned plagioclase grain size where amphibole is present. Using  $k = 1.45$  and  $m = 0.34$  (Mehl and Hirth (2008)), the average predicted plagioclase grain size is 30  $\mu\text{m}$  for an area with an average observed plagioclase grain size of 14  $\mu\text{m}$ . This suggests that neither annealing nor secondary phase pinning significantly affected the plagioclase grain size and that the observed grain size reflects the recrystallized grain size during deformation. Annealing may have been mitigated by the rapid cooling of these oceanic rocks (e.g., Mehl and Hirth, 2008).

## References

- Andersen, D.J., Lindsley, D.H., and Davidson, P.M., 1993, QUILF: A Pascal program to assess equilibria among Fe-Mg-Mn-Ti oxides, pyroxenes, olivine and quartz: *Computers & Geosciences*, v. 19, p. 1333-1350.
- Ben Ismaïl, W., and Mainprice, D., 1998, An olivine fabric database: and overview of upper mantle fabrics and seismic anisotropy: *Tectonophysics*, v. 296, p. 145-157.
- Holland, T.J.B., and Blundy, J., 1994, Non-ideal interactions in calcic amphiboles and their bearing on amphibole-plagioclase thermometry: *Contributions to Mineralogy and Petrology*, v. 116, p. 433-447.
- Lindsley, D.H., and Frost, B.R., 1992, Equilibria among Fe-Ti oxides, pyroxenes, olivine, and quartz: Part I. Theory: *American Mineralogist*, v. 77, p. 987-1003.
- Mehl, L., and Hirth, G., 2008, Plagioclase preferred orientation in layered mylonites: Evaluation of flow laws for the lower crust: *Journal of Geophysical Research*, v. 113, p. doi:10.1029/2007JB005075.
- Nicolas, A., and Boudier, F., 2008, Large shear zones with no relative displacement: *Terra Nova*, v. 20, p. 200-205.
- Olgaard, D.L., and Evans, B.W., 1986, Effect of second-phase particles on grain growth in calcite: *Journal of the American Ceramic Society*, v. 69, p. C-272 - C-277, doi:10.1111/j.1151-2916.1986.tb07374.x.
- Powell, R., and Holland, T.J.B., 1988, An internally consistent dataset with examples and a computer program: *Journal of Metamorphic Geology*, v. 6, p. 173-204.
- Underwood, E.E., 1970, *Quantitative Stereology*, 274 pp., Addison-Wesley-Longman, Reading, Mass.
- Van der Wal, D., 1993, Deformation processes in mantle peridotites. Ph.D. thesis, Utrecht, *Geologica Ultraiectina* 102.

## Figures

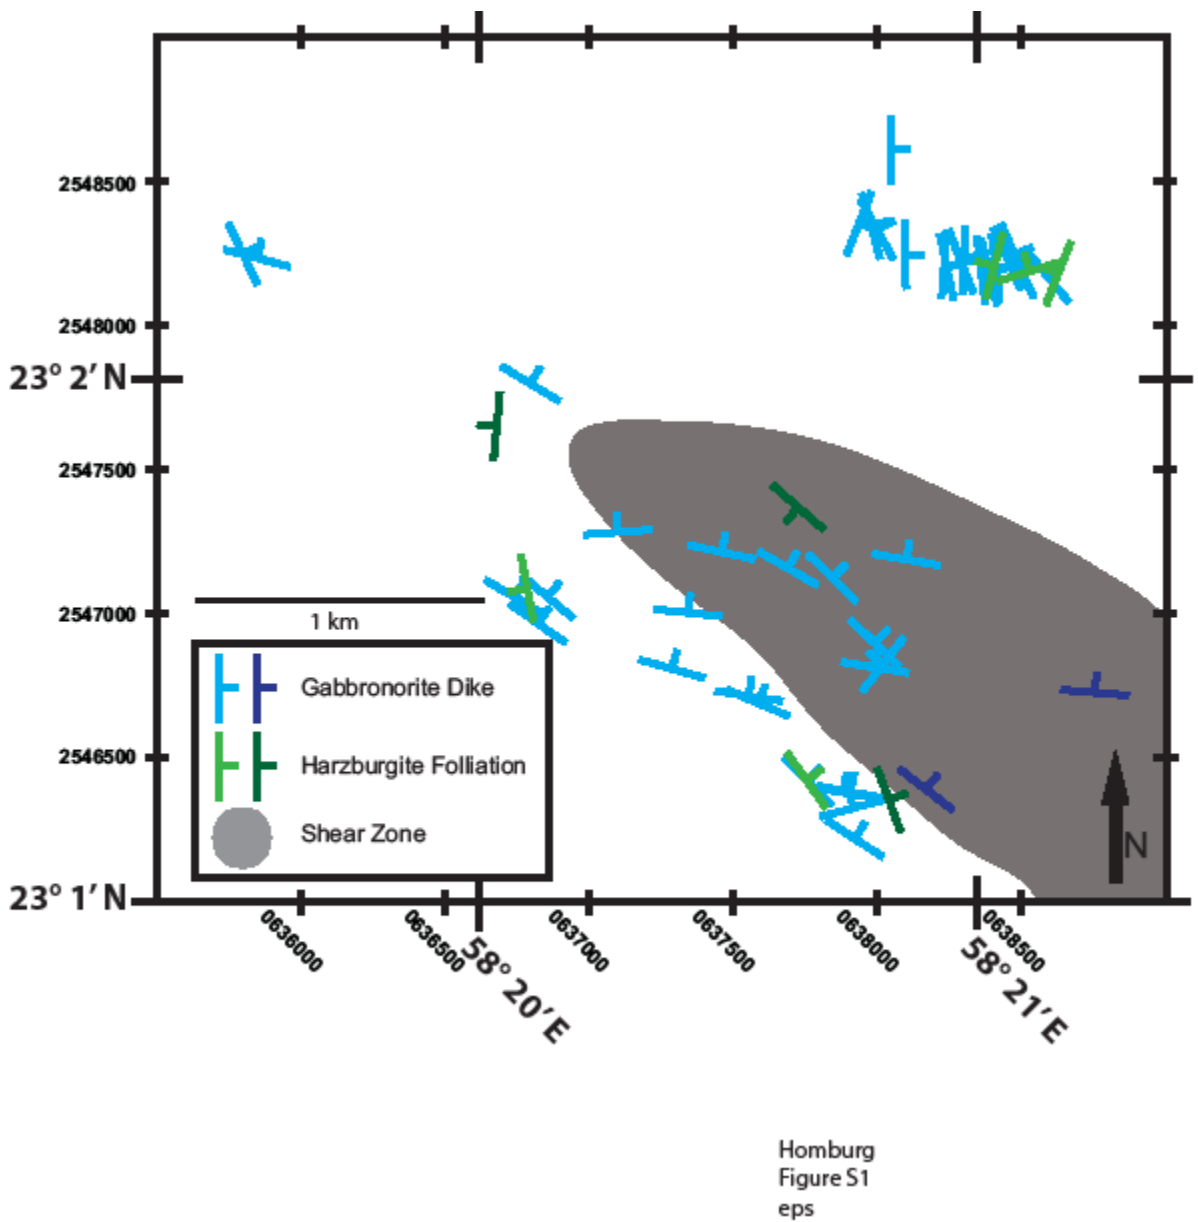

**Figure DR1:** Map of the field area containing orientation measurements of gabbro dike (blue) and harzburgite foliation (green). The darker colors represent measurements taken from Nicolas and Boudier (2008). The grey field is the trace of the mantle shear zone identified by Nicolas and Boudier (2008).

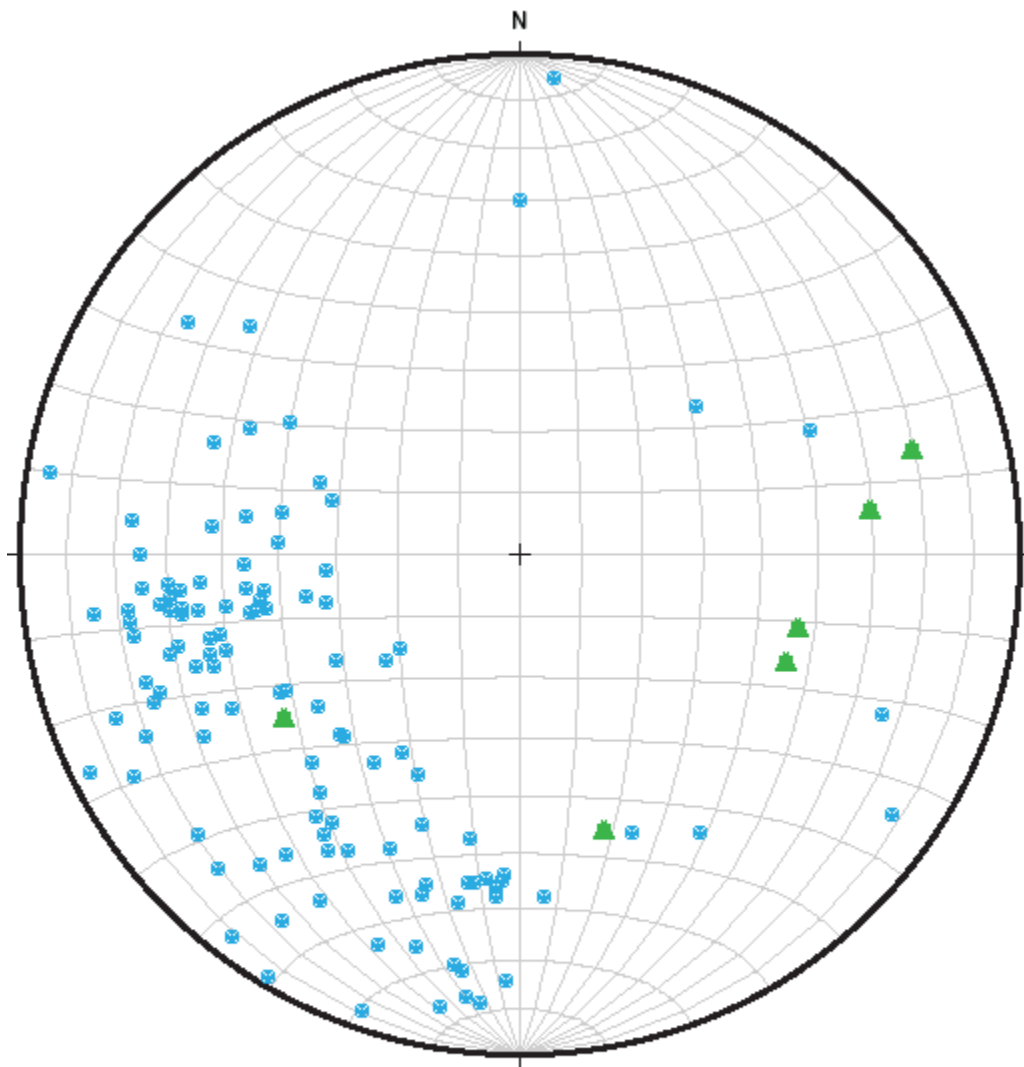

Homburg  
Figure S2  
eps

**Figure DR2:** Equal area projection of gabbro dike orientation (blue) and harzburgite foliation (green).

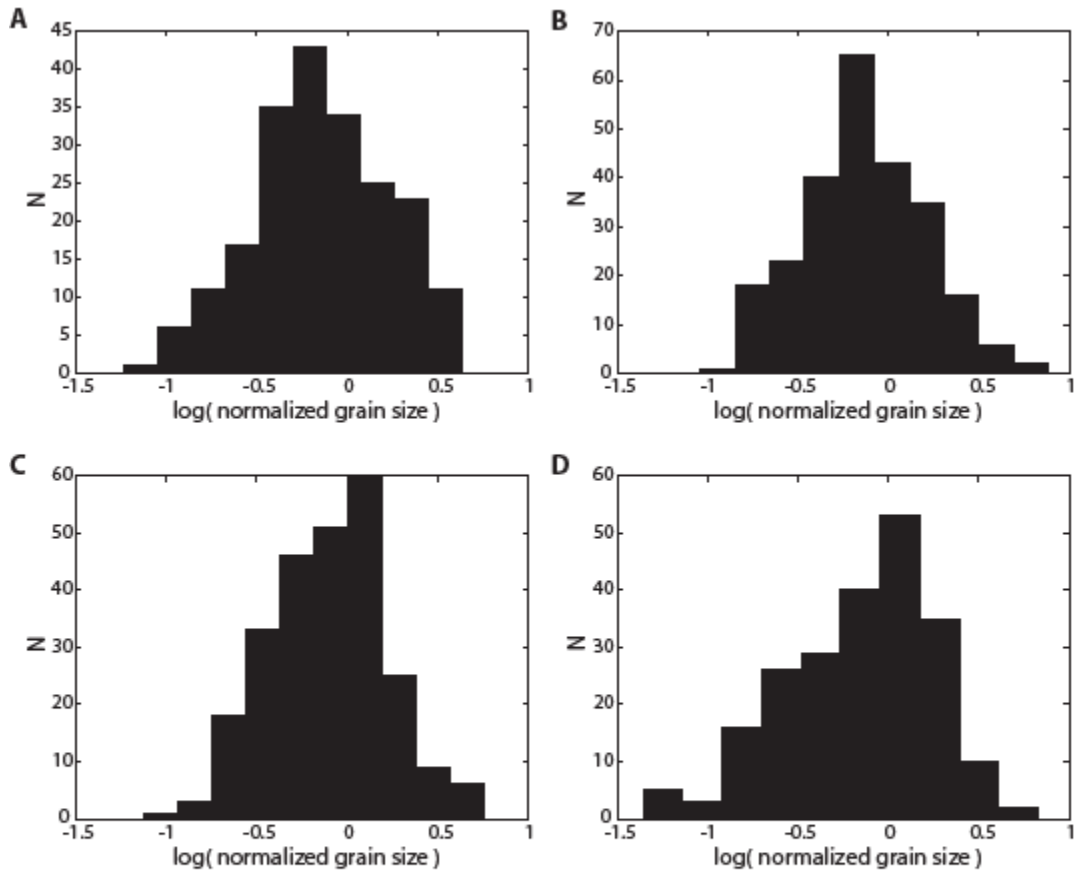

Homburg  
Figure S3  
eps

**Figure DR3:** Grain size distributions that correspond to A-C) the plagioclase in the three areas of the gabbro mylonite shown in Figure 2A 1-3) and D) the olivine in the harzburgite shown in Figure 2B. N is the number of grains. The standard deviations of grain size for plagioclase range from 33-73% of the mean with the largest standard deviations corresponding to areas that display disequilibrium deformation textures. The standard deviations of the grain size range from 58-76% of the mean for olivine.



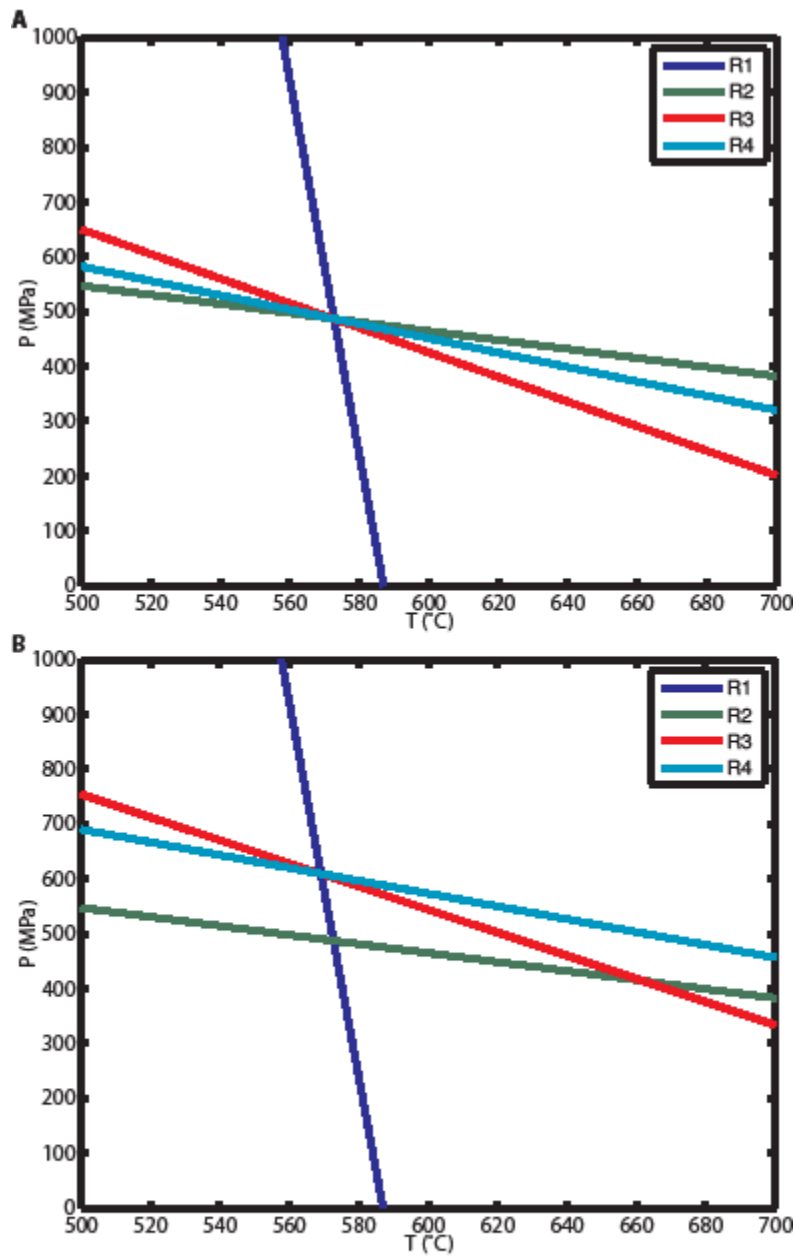

Homburg  
Figure S4  
eps

**Figure DR4:** Equilibria calculated for amphiboles A) 1 and B) 3. R1 – R4 refer to R1 – R4 in text.

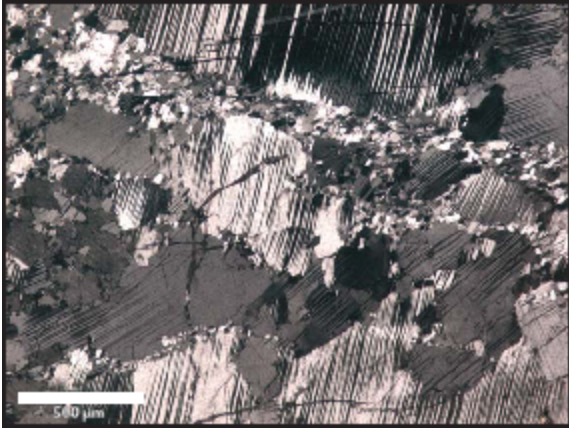

Homburg  
Figure S5  
eps

**Figure DR5:** Photomicrograph of a relatively undeformed gabbro-norite dike displaying highly twinned porphyroclasts rimmed by small recrystallized grains.

**Table DR1:** Pyroxene pair compositions given in oxide percent and estimated temperatures.

| Pair | Phase | SiO <sub>2</sub> | TiO <sub>2</sub> | Al <sub>2</sub> O <sub>3</sub> | Cr <sub>2</sub> O <sub>3</sub> | FeO   | MnO    | MgO   | CaO    | Na <sub>2</sub> O | Total  | Temperature (°C) |
|------|-------|------------------|------------------|--------------------------------|--------------------------------|-------|--------|-------|--------|-------------------|--------|------------------|
| 1    | OPX   | 54.93            | 0.0673           | 1.741                          | 0.0248                         | 11.68 | 0.2657 | 30.33 | 0.5498 | 0.0139            | 99.6   | 827 ± 46         |
|      | CPX   | 52.81            | 0.1591           | 1.9191                         | 0.0702                         | 3.83  | 0.0915 | 16.51 | 23.88  | 0.0857            | 99.36  |                  |
| 2    | OPX   | 54.81            | 0.0436           | 1.6996                         | 0.0192                         | 11.59 | 0.2658 | 29.94 | 0.5052 | 0                 | 98.87  | 821 ± 59         |
|      | CPX   | 52.68            | 0.1673           | 1.8833                         | 0.0581                         | 4.02  | 0.1483 | 16.53 | 23.77  | 0.0573            | 99.32  |                  |
| 3    | OPX   | 54.37            | 0.0428           | 1.3612                         | 0.0202                         | 12.47 | 0.2533 | 29.62 | 0.4056 | 0.014             | 98.56  | 828 ± 152        |
|      | CPX   | 53.13            | 0.1271           | 1.6323                         | 0.0421                         | 4.24  | 0.165  | 16.61 | 23.71  | 0.0372            | 99.69  |                  |
| 4    | OPX   | 54.65            | 0.0652           | 1.5831                         | 0.056                          | 12.74 | 0.2984 | 29.16 | 0.4889 | 0                 | 99.04  | 804 ± 17         |
|      | CPX   | 52.96            | 0.1764           | 1.6703                         | 0.0308                         | 3.99  | 0.1176 | 16.33 | 23.72  | 0.04              | 99.04  |                  |
| 5    | OPX   | 54.28            | 0.0376           | 1.6951                         | 0.0218                         | 12.82 | 0.1905 | 29.11 | 0.6351 | 0                 | 98.79  | 854 ± 73         |
|      | CPX   | 52.45            | 0.1552           | 2.58                           | 0.031                          | 4.48  | 0.1224 | 16.07 | 24.1   | 0.0418            | 100.02 |                  |
| 6    | OPX   | 54.48            | 0.0508           | 1.4592                         | 0.0115                         | 14.16 | 0.2563 | 28.38 | 0.4401 | 0                 | 99.24  | 759 ± 66         |
|      | CPX   | 53.02            | 0.1383           | 1.4153                         | 0.0216                         | 4.18  | 0.0885 | 16.28 | 24.52  | 0.0071            | 99.66  |                  |

**Table DR2:** Plagioclase compositions given in oxide percent.

| Analysis | SiO <sub>2</sub> | Al <sub>2</sub> O <sub>3</sub> | FeO     | MgO     | CaO      | Na <sub>2</sub> O | K <sub>2</sub> O | Total    | An Content |
|----------|------------------|--------------------------------|---------|---------|----------|-------------------|------------------|----------|------------|
| 1        | 44.42            | 36.61                          | 0.1373  | 0.0113  | 19.94    | 0.2096            | 0.003            | 101.34   | 98         |
| 2        | 44.31            | 36.4                           | 0.1023  | 0.0094  | 19.79    | 0.2694            | 0.003            | 100.88   | 98         |
| 3        | 43.96            | 36.53                          | 0.0688  | 0.0065  | 19.72    | 0.2219            | 0                | 100.52   | 98         |
| 4        | 43.88            | 36.41                          | 0.077   | 0.0026  | 19.66    | 0.3195            | 0.0024           | 100.35   | 97         |
| 5        | 44.45            | 35.61                          | 0.1598  | 0.0155  | 19.76    | 0.2548            | 0                | 100.25   | 98         |
| 6        | 44.39            | 36.38                          | 0.1024  | 0.0132  | 19.53    | 0.306             | 0.0079           | 100.73   | 97         |
| 7        | 44.04            | 36.23                          | 0.0854  | 0.0169  | 20.04    | 0.2463            | 0.0103           | 100.67   | 98         |
| 8        | 43.22334         | 36.48335                       | 0.02464 | 0.0064  | 20.03069 | 0.17568           | 0.02153          | 100      | 98         |
| 9        | 43.0015          | 36.48624                       | 0.11426 | 0.00715 | 20.1656  | 0.10691           | 0.00418          | 99.96786 | 99         |
| 10       | 43.06566         | 36.34677                       | 0.08497 | 0.00638 | 20.03998 | 0.19592           | 0.01607          | 99.75961 | 98         |
| 11       | 43.44502         | 36.28052                       | 0.04823 | 0       | 19.73167 | 0.30101           | 0                | 99.84606 | 97         |
| 12       | 43.4904          | 36.36016                       | 0.03253 | 0       | 19.88632 | 0.16132           | 0.01132          | 100.0355 | 98         |
| 13       | 42.8625          | 36.18185                       | 0.08807 | 0       | 19.94982 | 0.31141           | 0.0089           | 99.44111 | 97         |

|                                                                                            |
|--------------------------------------------------------------------------------------------|
| Analyses measured using a JEOL JXA-733 Superprobe (Massachusetts Institute of Technology)  |
| Analyses measured using a Cameca Sx100 microprobe (The American Museum of Natural History) |

**Table S3:** Amphibole compositions given in oxide percent

| Analysis | SiO <sub>2</sub> | TiO <sub>2</sub> | Al <sub>2</sub> O <sub>3</sub> | Cr <sub>2</sub> O <sub>3</sub> | FeO      | MnO     | MgO      | CaO      | Na <sub>2</sub> O | K <sub>2</sub> O | Total    | MG # |
|----------|------------------|------------------|--------------------------------|--------------------------------|----------|---------|----------|----------|-------------------|------------------|----------|------|
| 1        | 52.05265         | 0.28234          | 5.23215                        | 0.0182                         | 8.58851  | 0.16026 | 17.94999 | 12.17576 | 0.63172           | 0.12982          | 97.22141 | 79   |
| 2        | 53.65453         | 0.04115          | 3.12762                        | 0                              | 14.10423 | 0.57421 | 19.80348 | 6.07873  | 0.41733           | 0.02205          | 97.82333 | 71   |
| 3        | 54.57003         | 0.11003          | 2.52649                        | 0.016                          | 11.27614 | 0.35703 | 20.25484 | 8.16851  | 0.35962           | 0.01891          | 97.65759 | 76   |
| 4        | 54.88121         | 0.07997          | 2.02167                        | 0                              | 13.99136 | 0.60809 | 20.95897 | 4.61728  | 0.28469           | 0.02001          | 97.46325 | 73   |
| 5        | 55.70098         | 0.00926          | 1.52679                        | 0.01681                        | 10.60965 | 0.39185 | 20.66375 | 8.55836  | 0.20571           | 0.00726          | 97.69041 | 78   |
